# Supplementary material for: Role of efficacy as a determinant of locomotor activation by mu‐opioid receptor (MOR) ligands in female and male mice. II. Effects of novel MOR‐selective phenylmorphans with high‐to‐low MOR efficacy
Source: PubMed Central journal article supplement — Pharmacol Res Perspect. 2023 Jun 28;11(4):e01111. doi: 10.1002/prp2.1111 (PMC10307939; doi:10.1002/prp2.1111), 2023-06-28

## **Supplemental Material for**

### **Role of Efficacy as a Determinant of Locomotor Activation**

#### **by Mu Opioid Receptor (MOR) Ligands in Female and Male Mice. II.**

#### **Effects of Novel MOR-Selective Phenylmorphans with High to Low MOR Efficacy**

Edna J. Santos<sup>\*a</sup>, Nima Nassehi<sup>\*a</sup>, Eric W. Bow<sup>b</sup>, Dana R. Chambers<sup>b</sup>, Eugene S. Gutman<sup>b</sup>, Arthur E. Jacobson<sup>b</sup>, Joshua A. Lutz<sup>b</sup>, Samuel A. Marsh<sup>a</sup>, Kenner C. Rice<sup>b</sup>, Agnieszka Sulima<sup>b</sup>, Dana E. Selley<sup>a</sup>, and S. Stevens Negus<sup>a</sup>.

\*Co-First Authors

<sup>a</sup>Department of Pharmacology & Toxicology, Virginia Commonwealth University, Richmond, VA

<sup>b</sup>Drug Design and Synthesis Section, Molecular Targets and Medications Discovery Branch, NIDA and NIAAA, Bethesda, MD

**Supplemental Table 1:** Two-way ANOVA results and post hoc power analyses to assess the role of sex as a determinant of opioid-induced locomotor activation in female and male ICR mice.

| Treatment    | Dependent measure      | Partial eta <sup>2</sup> | F statistic, p value              | Cohen's Effect Size<br>(Cohen's F) | Current Power | Sample Size: Power≥0.8 |
|--------------|------------------------|--------------------------|-----------------------------------|------------------------------------|---------------|------------------------|
| Methadone    | Dose Main Effect       | 0.795                    | F (2.82, 28.20) = 38.74; P<0.0001 | 1.968                              | 1             | 3                      |
|              | Sex Main Effect        | 0.015                    | F (1, 10) = 0.42; P=0.5335        | 0.125                              | 0.123         | >100                   |
|              | Dose x Sex Interaction | 0.089                    | F (4, 40) = 0.98; P=0.4286        | 0.313                              | 0.739         | 14                     |
| Tianeptine   | Dose Main Effect       | 0.888                    | F (1.89, 18.85) = 79.10; P<0.0001 | 2.813                              | 1             | 3                      |
|              | Sex Main Effect        | 0.00007                  | F (1, 10) = 0.001; P=0.9745       | 0.009                              | 0.050         | >100                   |
|              | Dose x Sex Interaction | 0.003                    | F (3, 30) = 0.03; P=0.9924        | 0.056                              | 0.066         | >100                   |
| DC-01-128.1  | Dose Main Effect       | 0.766                    | F (2.58, 25.83) = 32.75; P<0.0001 | 1.809                              | 1             | 3                      |
|              | Sex Main Effect        | 0.061                    | F (1, 10) = 1.45; P=0.2560        | 0.254                              | 0.357         | 34                     |
|              | Dose x Sex Interaction | 0.133                    | F (4, 40) = 1.54; P=0.2090        | 0.392                              | 0.919         | 10                     |
| DC-01-76.2   | Dose Main Effect       | 0.683                    | F (1.90, 19.04) = 21.55; P<0.0001 | 1.468                              | 1             | 4                      |
|              | Sex Main Effect        | 0.0003                   | F (1, 10) = 0.001; P=0.9743       | 0.018                              | 0.052         | >100                   |
|              | Dose x Sex Interaction | 0.173                    | F (4, 40) = 2.09; P=0.0992        | 0.458                              | 0.979         | 8                      |
| EWB-3-14     | Dose Main Effect       | 0.678                    | F (2.74, 27.36) = 21.08; P<0.0001 | 1.452                              | 1             | 4                      |
|              | Sex Main Effect        | 0.004                    | F (1, 10) = 0.05; P=0.8227        | 0.059                              | 0.066         | >100                   |
|              | Dose x Sex Interaction | 0.0357                   | F (6, 60) = 0.37; P=0.8952        | 0.192                              | 0.377         | 28                     |
| JL-02-0039   | Dose Main Effect       | 0.796                    | F (2.11, 21.07) = 38.95; P<0.0001 | 1.97                               | 1             | 3                      |
|              | Sex Main Effect        | 0.010                    | F (1, 10) = 0.05; P=0.8336        | 0.103                              | 0.099         | >100                   |
|              | Dose x Sex Interaction | 0.054                    | F (4, 40) = 0.57; P=0.6885        | 0.238                              | 0.474         | 23                     |
| DC-01-0076.1 | Dose Main Effect       | 0.448                    | F (2.33, 23.28) = 8.11; P=0.0014  | 0.900                              | 0.999         | 5                      |
|              | Sex Main Effect        | 0.217                    | F (1, 10) = 2.93; P=0.1179        | 0.527                              | 0.907         | 10                     |
|              | Dose x Sex Interaction | 0.132                    | F (5, 50) = 1.52; P=0.1991        | 0.390                              | 0.949         | 9                      |
| EG-1-203     | Dose Main Effect       | 0.390                    | F (1.75, 17.54) = 6.39; P=0.0101  | 0.800                              | 0.999         | 6                      |
|              | Sex Main Effect        | 0.456                    | F (1, 10) = 2.30; P=0.1601        | 0.915                              | 0.999         | 6                      |
|              | Dose x Sex Interaction | 0.274                    | F (3, 30) = 3.77; <b>P=0.0208</b> | 0.614                              | 0.999         | 6                      |
| EG-1-230     | Dose Main Effect       | 0.031                    | F (2.43, 21.90) = 0.29; P=0.7949  | 0.178                              | 0.204         | 53                     |
|              | Sex Main Effect        | 0.012                    | F (1, 9) = 0.30; P=0.5953         | 0.108                              | 0.099         | >100                   |
|              | Dose x Sex Interaction | 0.012                    | F (3, 27) = 0.11; P=0.9553        | 0.109                              | 0.109         | >100                   |

**Supplemental Figure 1.** Relationship between in vitro MOR drug affinities (Log  $K_i$  values in nM) determined in receptor binding assays and in vitro MOR-mediated drug potencies (Log  $EC_{50}$  values in nM) determined in an assay of ligand-stimulated [ $^{35}$ S]GTP $\gamma$ S binding. The correlation was statistically significant ( $R^2=0.88$ ,  $p=0.0002$ ).

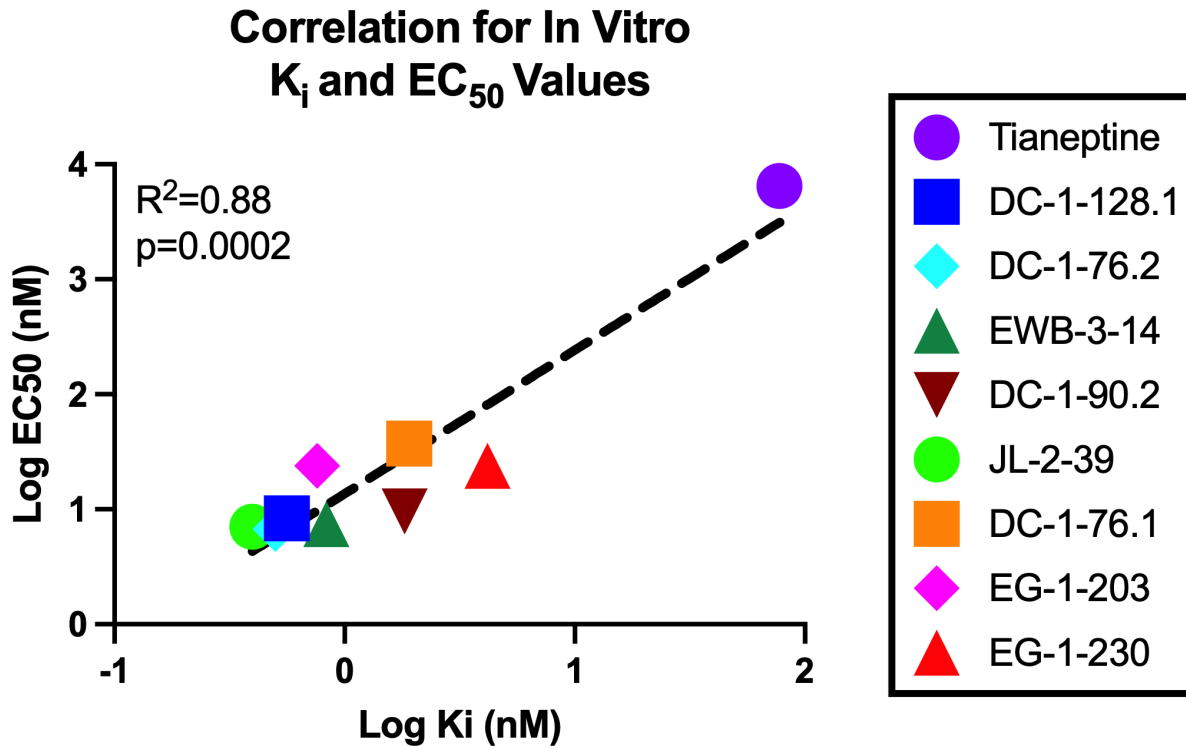

**Supplemental Figure 2.** Raw data from studies of locomotor activity in mice. The left panel shows the higher MOR efficacy drugs tested in this study, and the left panel shows effects of the lower MOR efficacy drugs. Abscissae: Drug dose in mg/kg (log scale). Veh=vehicle. Ordinates: total number of locomotor counts (photobeam breaks) during a 60-min test session. Each point shows mean  $\pm$  SEM from 12 mice (6 female, 6 male) except EG-1-230, which shows data from 11 mice (6 female, 5 male).

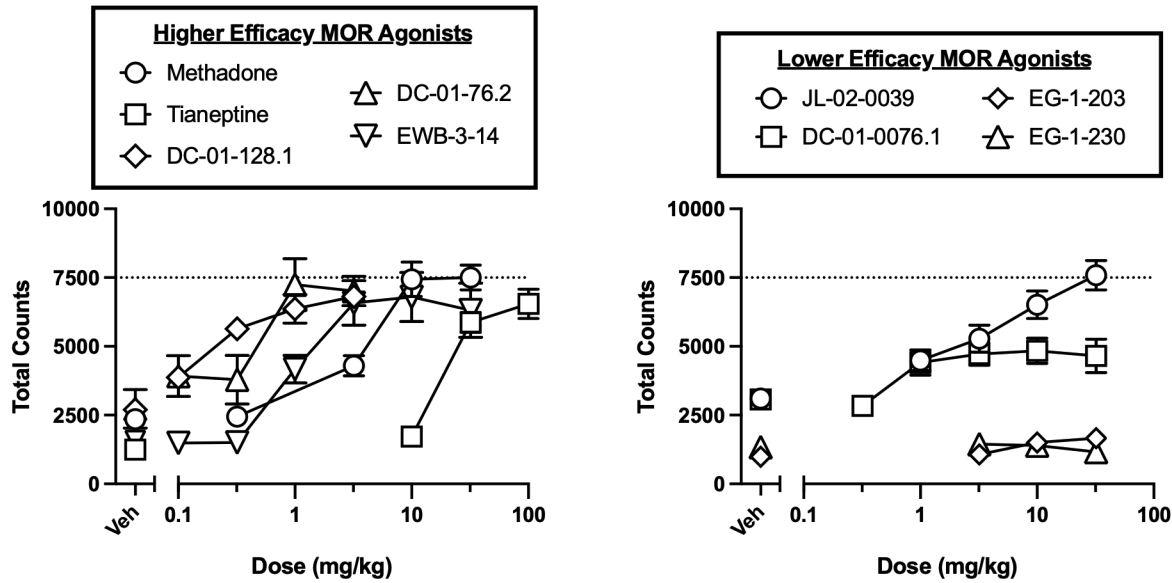

Supplement: PRP2-11-e01111-s001.pdf [file PRP2-11-e01111-s001.pdf]
